# Supplementary material
Source: Springer Nature journal article supplement (https://www.springermedizin.de/resource/supplementary/12885_2012_3716_MOESM4_ESM.pdf/9465920)

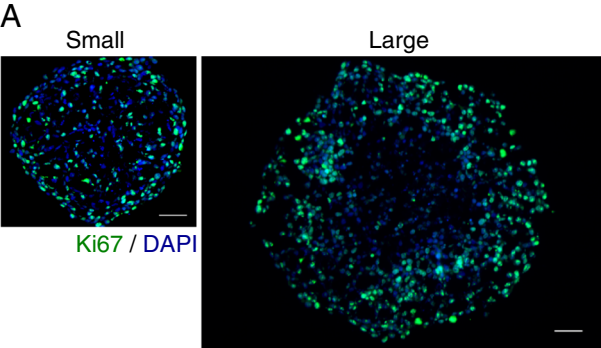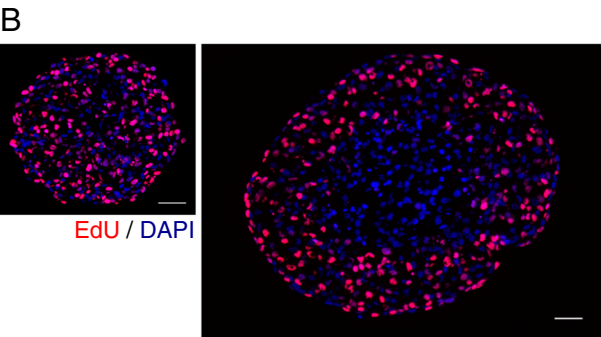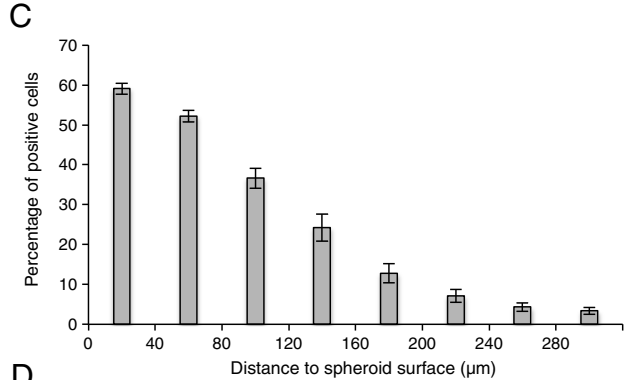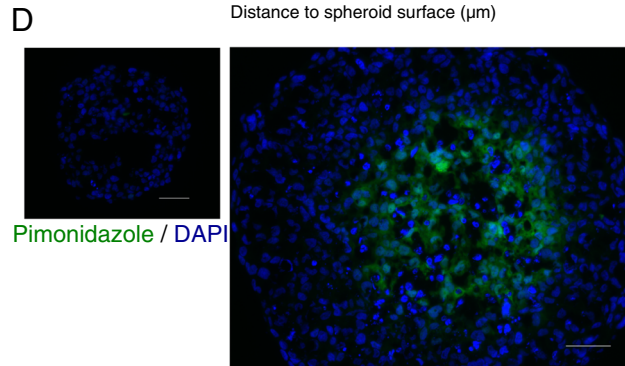

Supplement: MOESM4 [file 9465920]
